# Supplementary material
Source: PubMed Central journal article supplement (PMC4066733)
Supplement: NIHMS572028-supplement.pdf [file NIHMS572028-supplement.pdf]

## Does neighborhood collective efficacy for families change over time? The Boston Neighborhood Survey – Online Appendices

Appendix Table 1. Individual-level descriptive statistics for Boston Neighborhoods Survey

| Variable                               | 2006 - n=1707 |         |       |       |       |      | 2008 - n=1710 |         |       |       |       |      | 2010 - n=1718 |         |       |       |       |      | p   |
|----------------------------------------|---------------|---------|-------|-------|-------|------|---------------|---------|-------|-------|-------|------|---------------|---------|-------|-------|-------|------|-----|
|                                        | n             | Total n | Mean  | SD    | Min   | Max  | n             | Total n | Mean  | SD    | Min   | Max  | n             | Total n | Mean  | SD    | Min   | Max  |     |
| Male                                   | 766           | 1707    | 0.45  | 0.50  | 0     | 1    | 719           | 1710    | 0.42  | 0.49  | 0     | 1    | 638           | 1718    | 0.37  | 0.48  | 0     | 1    | *** |
| Female                                 | 941           | 1707    | 0.55  | 0.50  | 0     | 1    | 991           | 1710    | 0.58  | 0.49  | 0     | 1    | 1080          | 1718    | 0.63  | 0.48  | 0     | 1    |     |
| Age                                    |               | 1685    | 51.68 | 16.96 | 18    | 92   |               | 1694    | 52.87 | 16.33 | 18    | 99   |               | 1695    | 55.61 | 16.29 | 18    | 97   | *** |
| Race/Ethnicity                         |               |         |       |       |       |      |               |         |       |       |       |      |               |         |       |       |       |      |     |
| Black                                  | 333           | 1673    | 0.20  | 0.40  | 0     | 1    | 339           | 1682    | 0.20  | 0.40  | 0     | 1    | 341           | 1677    | 0.20  | 0.40  | 0     | 1    |     |
| White                                  | 1071          | 1673    | 0.64  | 0.48  | 0     | 1    | 1064          | 1682    | 0.63  | 0.48  | 0     | 1    | 1010          | 1677    | 0.60  | 0.49  | 0     | 1    |     |
| Hispanic                               | 141           | 1673    | 0.08  | 0.28  | 0     | 1    | 147           | 1682    | 0.09  | 0.28  | 0     | 1    | 174           | 1677    | 0.10  | 0.31  | 0     | 1    |     |
| Other                                  | 128           | 1673    | 0.08  | 0.27  | 0     | 1    | 132           | 1682    | 0.08  | 0.27  | 0     | 1    | 152           | 1677    | 0.09  | 0.29  | 0     | 1    |     |
| Foreign Born                           | 344           | 1705    | 0.20  | 0.40  | 0     | 1    | 355           | 1708    | 0.21  | 0.41  | 0     | 1    | 379           | 1713    | 0.22  | 0.42  | 0     | 1    |     |
| Education                              |               |         |       |       |       |      |               |         |       |       |       |      |               |         |       |       |       |      |     |
| < HS                                   | 100           | 1698    | 0.06  | 0.24  | 0     | 1    | 131           | 1694    | 0.08  | 0.27  | 0     | 1    | 133           | 1704    | 0.08  | 0.27  | 0     | 1    |     |
| High school diploma or GED             | 371           | 1698    | 0.22  | 0.41  | 0     | 1    | 336           | 1694    | 0.20  | 0.40  | 0     | 1    | 342           | 1704    | 0.20  | 0.40  | 0     | 1    |     |
| Some College                           | 400           | 1698    | 0.24  | 0.42  | 0     | 1    | 394           | 1694    | 0.23  | 0.42  | 0     | 1    | 411           | 1704    | 0.24  | 0.43  | 0     | 1    |     |
| Bachelors                              | 307           | 1698    | 0.18  | 0.38  | 0     | 1    | 338           | 1694    | 0.20  | 0.40  | 0     | 1    | 326           | 1704    | 0.19  | 0.39  | 0     | 1    |     |
| Graduate Study                         | 520           | 1698    | 0.31  | 0.46  | 0     | 1    | 495           | 1694    | 0.29  | 0.45  | 0     | 1    | 492           | 1704    | 0.29  | 0.45  | 0     | 1    |     |
| Annual Income                          |               |         |       |       |       |      |               |         |       |       |       |      |               |         |       |       |       |      | *** |
| <20K                                   | 293           | 1707    | 0.17  | 0.38  | 0     | 1    | 216           | 1710    | 0.13  | 0.33  | 0     | 1    | 281           | 1718    | 0.16  | 0.37  | 0     | 1    |     |
| 20-40K                                 | 303           | 1707    | 0.18  | 0.38  | 0     | 1    | 301           | 1710    | 0.18  | 0.38  | 0     | 1    | 271           | 1718    | 0.16  | 0.36  | 0     | 1    |     |
| 40-80K                                 | 361           | 1707    | 0.21  | 0.41  | 0     | 1    | 396           | 1710    | 0.23  | 0.42  | 0     | 1    | 339           | 1718    | 0.20  | 0.40  | 0     | 1    |     |
| 80-100K                                | 127           | 1707    | 0.07  | 0.26  | 0     | 1    | 160           | 1710    | 0.09  | 0.29  | 0     | 1    | 165           | 1718    | 0.10  | 0.29  | 0     | 1    |     |
| >100K                                  | 293           | 1707    | 0.17  | 0.38  | 0     | 1    | 333           | 1710    | 0.19  | 0.40  | 0     | 1    | 318           | 1718    | 0.19  | 0.39  | 0     | 1    |     |
| Missing Income                         | 330           | 1707    | 0.19  | 0.40  | 0     | 1    | 304           | 1710    | 0.18  | 0.38  | 0     | 1    | 344           | 1718    | 0.20  | 0.40  | 0     | 1    |     |
| Neighborhood Tenure                    |               | 1703    | 18.87 | 17.39 | 0     | 85   |               | 1706    | 19.09 | 17.09 | 0     | 91   |               | 1710    | 22.09 | 18.10 | 0     | 94   | *** |
| Home Owner                             | 958           | 1691    | 0.57  | 0.50  | 0     | 1    | 1004          | 1699    | 0.59  | 0.49  | 0     | 1    | 1054          | 1700    | 0.62  | 0.49  | 0     | 1    | **  |
| Renter                                 | 624           | 1691    | 0.37  | 0.48  | 0     | 1    | 595           | 1699    | 0.35  | 0.48  | 0     | 1    | 646           | 1700    | 0.38  | 0.49  | 0     | 1    |     |
| Social Cohesion <sup>a</sup>           |               | 1707    | 3.61  | 0.69  | 1     | 5    |               | 1710    | 3.61  | 0.64  | 1     | 5    |               | 1718    | 3.68  | 0.65  | 1     | 5    | **  |
| Informal Social Control <sup>a</sup>   |               | 1707    | 3.76  | 0.85  | 1     | 5    |               | 1710    | 3.82  | 0.85  | 1     | 5    |               | 1718    | 3.83  | 0.82  | 1     | 5    | *   |
| Intergenerational Closure <sup>a</sup> |               | 1707    | 3.61  | 0.70  | 1     | 5    |               | 1710    | 3.61  | 0.67  | 1     | 5    |               | 1718    | 3.61  | 0.62  | 1     | 5    |     |
| Collective Efficacy for Families       |               | 1703    | -0.03 | 0.98  | -3.29 | 2.41 |               | 1707    | -0.01 | 0.94  | -3.59 | 2.41 |               | 1715    | 0.04  | 0.91  | -3.59 | 2.41 |     |

<sup>a</sup> Before creating the mean score, items were recoded to a 5-point scale and missing data was imputed to the row-column mean (on average, 13% of scale items are missing).

Appendix Table 2. Demographics of 2006, 2008, and 2010 BNS and city of Boston from ACS 2005-2009

| Variable              | 2006 BNS               | 2008 BNS               | 2010 BNS               | 2006-2010<br>BNS       | 2005-2009<br>ACS      |
|-----------------------|------------------------|------------------------|------------------------|------------------------|-----------------------|
|                       | % or $\mu$<br>(median) | % or $\mu$<br>(median) | % or $\mu$<br>(median) | % or $\mu$<br>(median) | % or median           |
| <b>Gender</b>         |                        |                        |                        |                        |                       |
| Male                  | 0.45                   | 0.42                   | 0.37                   | 0.41                   | 0.48                  |
| Female                | 0.55                   | 0.58                   | 0.63                   | 0.59                   | 0.52                  |
| Age                   | 51.68 (52)             | 52.87 (53)             | 55.61 (56)             | 53.39 (54)             | 31.9                  |
| <b>Race/Ethnicity</b> |                        |                        |                        |                        |                       |
| Black                 | 0.20                   | 0.20                   | 0.20                   | 0.20                   | 0.23                  |
| White                 | 0.64                   | 0.63                   | 0.60                   | 0.63                   | 0.57                  |
| Hispanic              | 0.08                   | 0.09                   | 0.10                   | 0.09                   | 0.16                  |
| Other                 | 0.08                   | 0.08                   | 0.09                   | 0.08                   | 0.17                  |
| Foreign born          | 0.20                   | 0.21                   | 0.22                   | 0.21                   | 0.27                  |
| <b>Education</b>      |                        |                        |                        |                        |                       |
| < HS                  | 0.06                   | 0.08                   | 0.08                   | 0.07                   | 0.16                  |
| HS/GED                | 0.22                   | 0.20                   | 0.20                   | 0.21                   | 0.23                  |
| Some College          | 0.24                   | 0.23                   | 0.24                   | 0.24                   | 0.18                  |
| Bachelors             | 0.18                   | 0.20                   | 0.19                   | 0.19                   | 0.24                  |
| Grad Study            | 0.31                   | 0.29                   | 0.29                   | 0.30                   | 0.19                  |
| <b>Income</b>         |                        |                        |                        |                        |                       |
| <20K                  | 0.21                   | 0.15                   | 0.16                   | 0.15                   | 0.24                  |
| 20-40K                | 0.22                   | 0.21                   | 0.16                   | 0.17                   | 0.16                  |
| 40-80K                | 0.26                   | 0.28                   | 0.20                   | 0.21                   | 0.24 (40-<br>74,999K) |
| 80-100K               | 0.09                   | 0.11                   | 0.10                   | 0.09                   | 0.11 (75-100K)        |
| >100K                 | 0.21                   | 0.24                   | 0.19                   | 0.18                   | 0.24                  |
| <b>Tenure</b>         |                        |                        |                        |                        |                       |
| own                   | 0.57                   | 0.59                   | 0.62                   | 0.59                   | 0.37                  |
| rent                  | 0.37                   | 0.35                   | 0.38                   | 0.37                   | 0.63                  |
